# Supplementary figures and images for: Effects of Changes in Osmolarity on the Biological Activity of Human Normal Nucleus Pulposus-Derived Mesenchymal Stem Cells
Source: Research Square preprint supplement (doi:10.21203/rs.3.rs-462338/v1), 2021-05-06

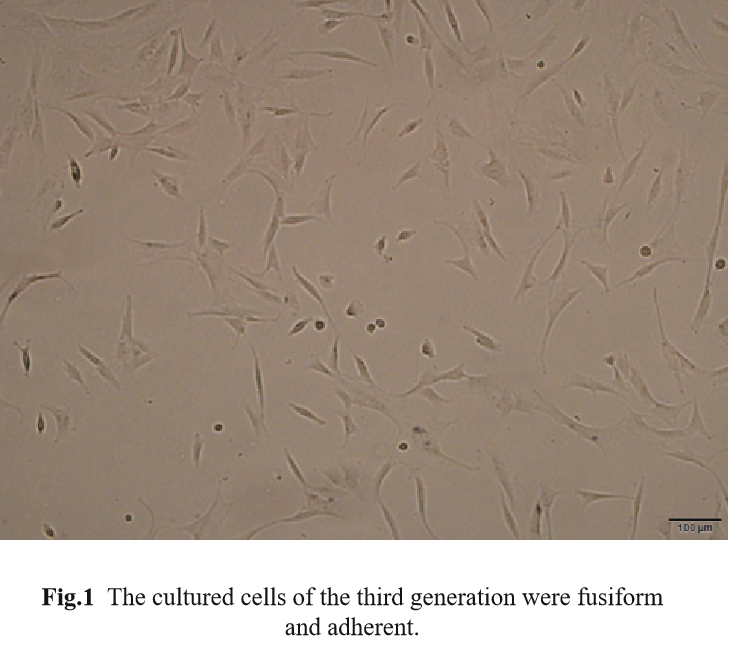


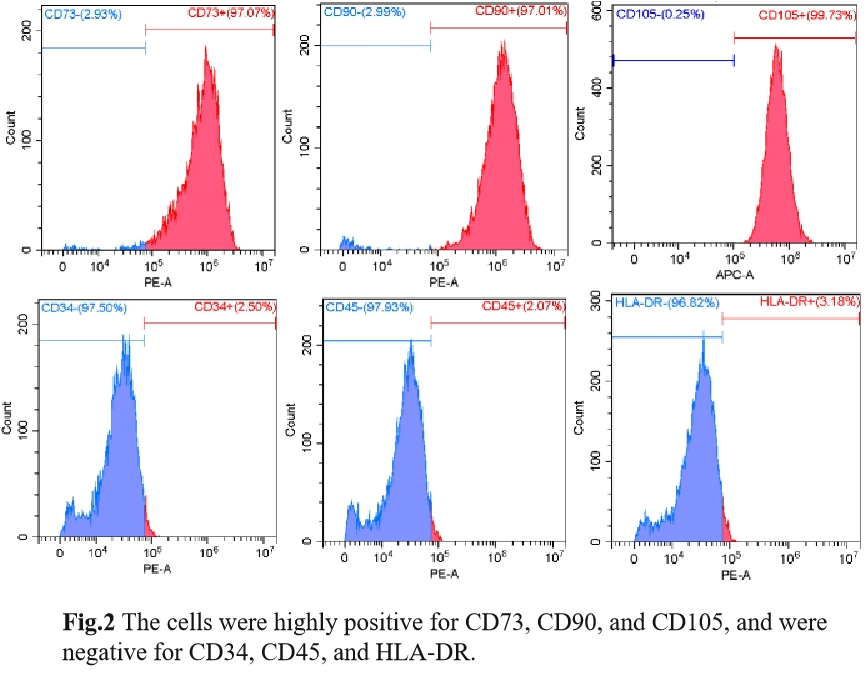

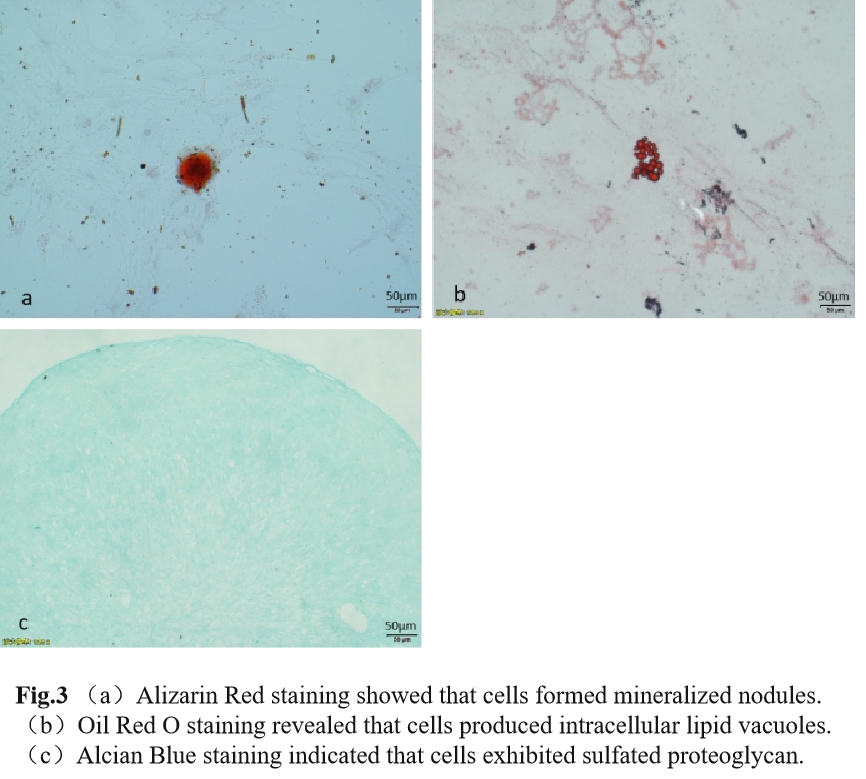

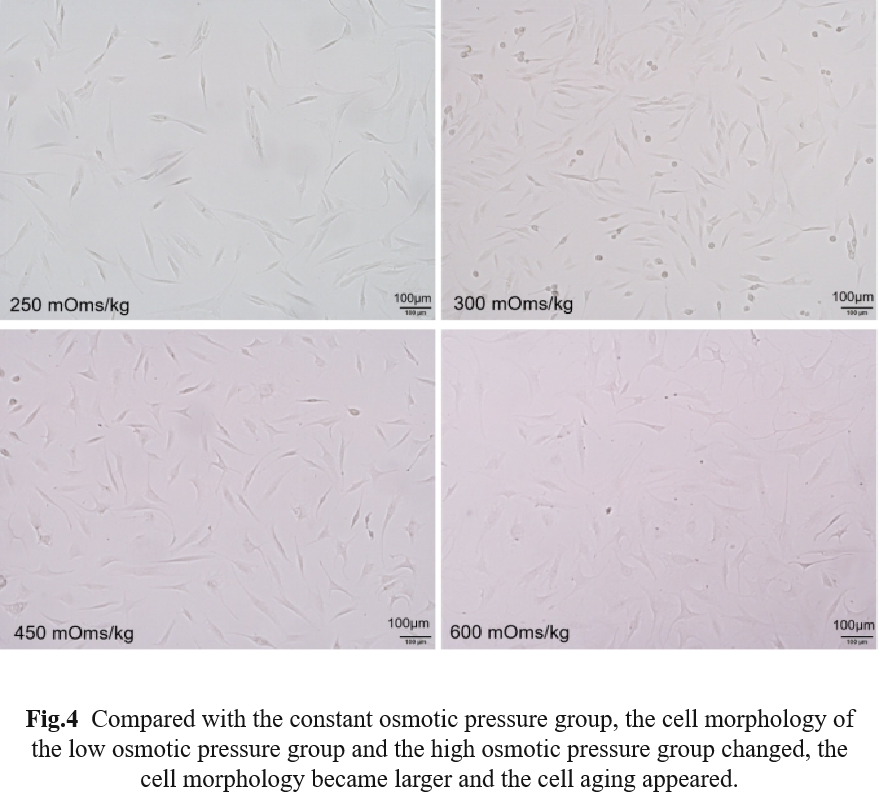


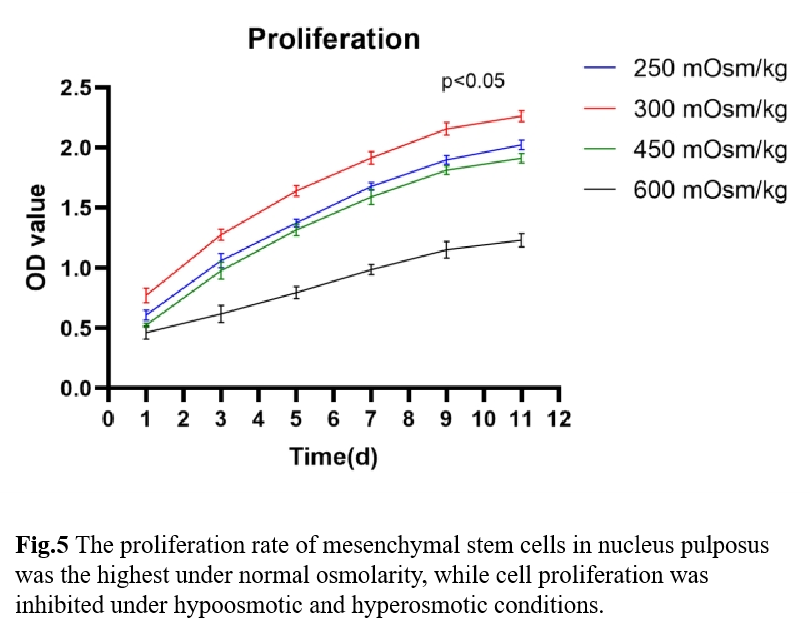


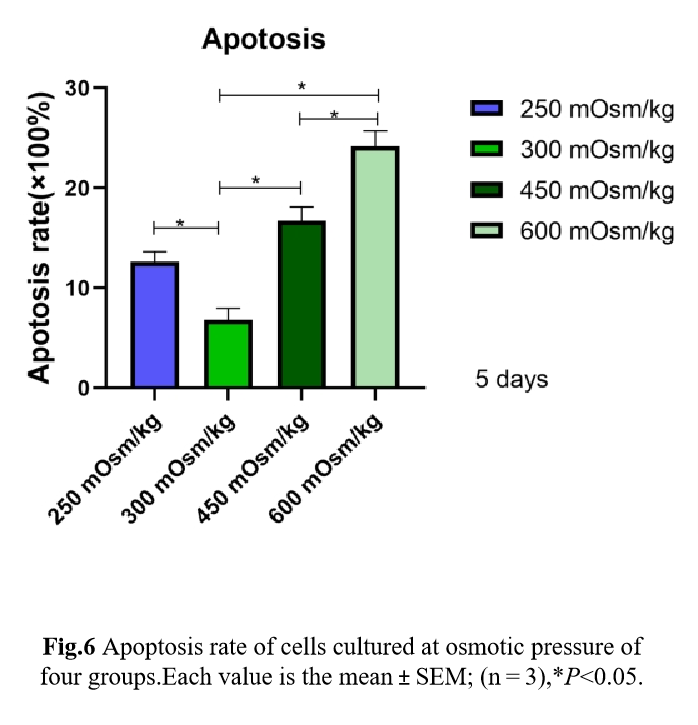

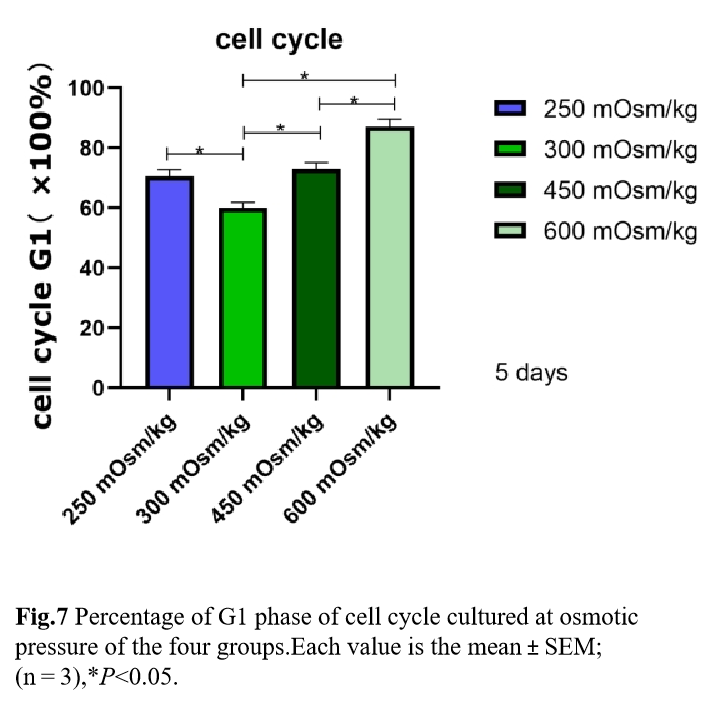

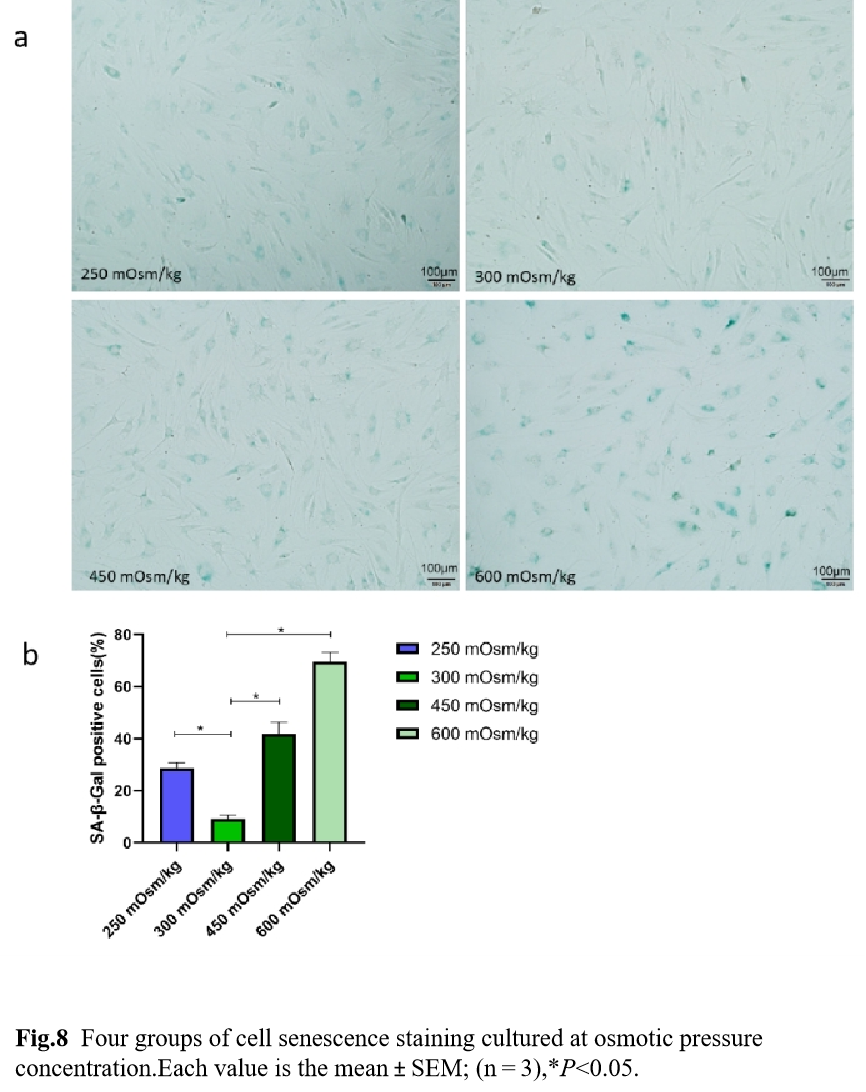

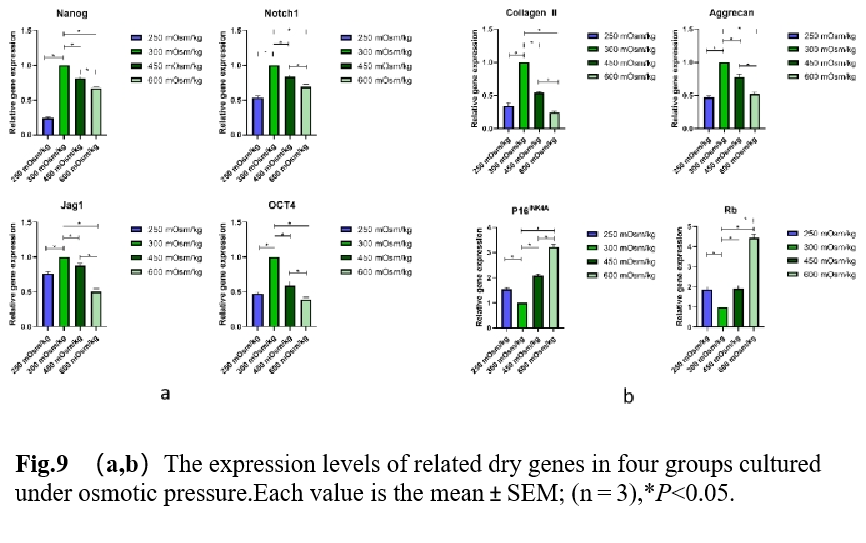


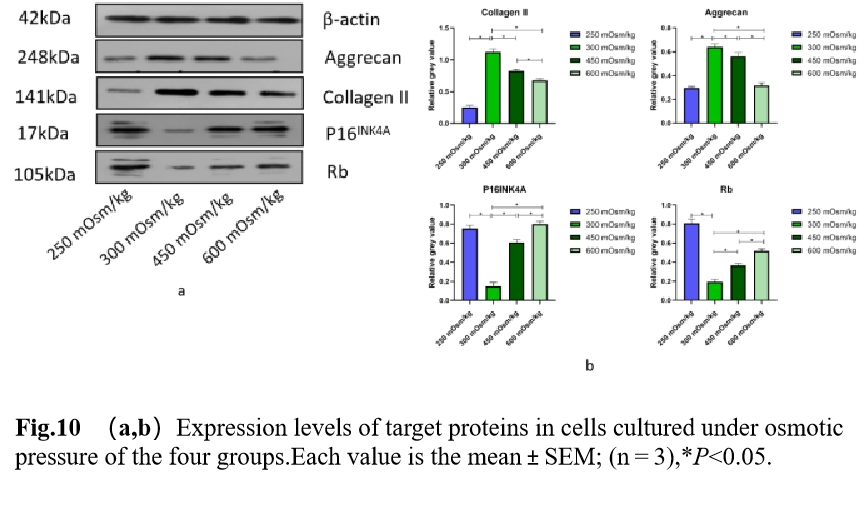

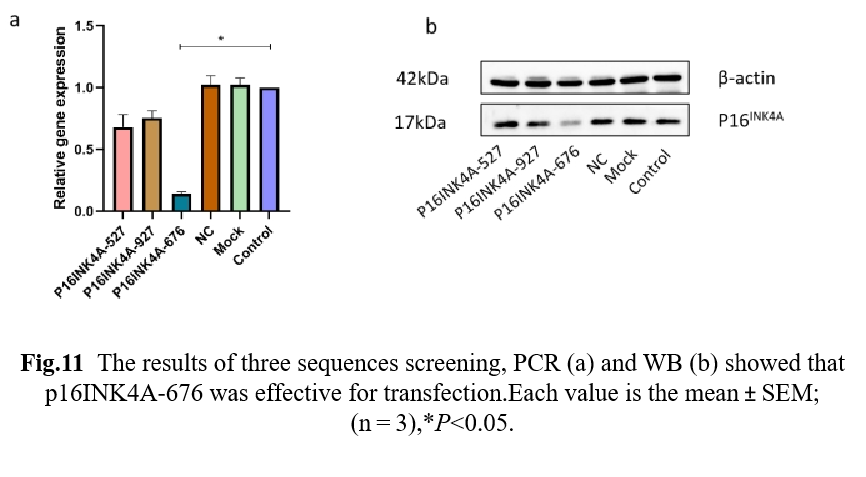

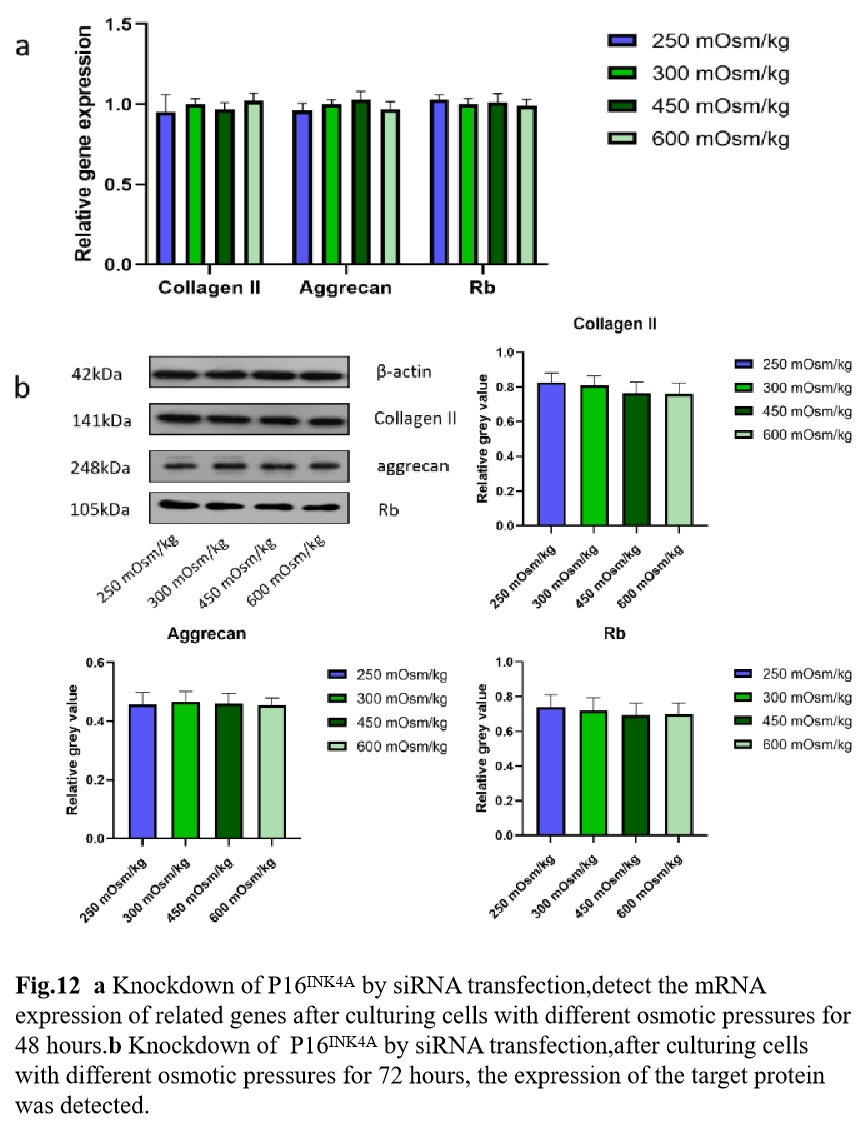

Supplement: Supplementary file 1 [file ab032b5461242cd5efbe8db5.docx]
